# Supplementary material for: Tissue mortality by Caribbean ciliate infection and white band disease in three reef-building coral species
Source: PeerJ. 2016 Jul 26;4:e2196. doi: 10.7717/peerj.2196 (PMC4975001; doi:10.7717/peerj.2196)
Supplement: Data S1 [file peerj-04-2196-s001.xlsx]

## Sheet: April-May2012
Orbicella annularis and Orbicella faveolata							Acropora cervicornis
Site	Species	Replica	Position	Mortality Rate (cm/day)			Site	Disease	Replica	Mortality Rate (cm/day)
Cayo de Agua	Orbicella annularis	1	1	0.0973931			Cayo de Agua	Caribbean Ciliate Infection	1	0.0399353
Cayo de Agua	Orbicella annularis	1	2	0.129977			Cayo de Agua	Caribbean Ciliate Infection	2	0.0582471
Cayo de Agua	Orbicella annularis	1	3	0.039894			Cayo de Agua	Caribbean Ciliate Infection	3	0.00995
Cayo de Agua	Orbicella annularis	2	1	0.0349939			Cayo de Agua	Caribbean Ciliate Infection	4	0.138225
Cayo de Agua	Orbicella annularis	2	2	0.0602728			Cayo de Agua	Caribbean Ciliate Infection	5	0.0347676
Cayo de Agua	Orbicella annularis	2	3	0.0579403			Cayo de Agua	Caribbean Ciliate Infection	6	0.0137
Cayo de Agua	Orbicella annularis	3	1	0.0140524			Cayo de Agua	Caribbean Ciliate Infection	7	0.00782353
Cayo de Agua	Orbicella annularis	3	2	0.0455488			Cayo de Agua	Caribbean Ciliate Infection	8	0.0575853
Cayo de Agua	Orbicella annularis	3	3	0.0213764			Cayo de Agua	White Band Disease	1	0.0251353
Cayo de Agua	Orbicella annularis	4	1	0.0261422			Cayo de Agua	White Band Disease	2	0.201491
Cayo de Agua	Orbicella annularis	4	2	0.031864			Cayo de Agua	White Band Disease	3	0.350097
Cayo de Agua	Orbicella annularis	4	3	0.0429103			Cayo de Agua	White Band Disease	4	0
Cayo de Agua	Orbicella annularis	5	1	0.0300872			Cayo de Agua	White Band Disease	5	0.0367
Cayo de Agua	Orbicella annularis	5	2	0.0327064			Cayo de Agua	White Band Disease	6	0.356994
Cayo de Agua	Orbicella annularis	5	3	0.0344134			Cayo de Agua	White Band Disease	7	0.3367
Cayo de Agua	Orbicella annularis	6	1	0.0666191			Cayo de Agua	White Band Disease	8	0.0205147
Cayo de Agua	Orbicella annularis	6	2	0.0506425			Cayo de Agua	White Band Disease	9	0.0555382
Cayo de Agua	Orbicella annularis	6	3	0.047787			Dos Mosquises Sur	Caribbean Ciliate Infection	1	0.159953
Cayo de Agua	Orbicella annularis	7	1	0.0237385			Dos Mosquises Sur	Caribbean Ciliate Infection	2	0.204087
Cayo de Agua	Orbicella annularis	7	2	0.0241288			Dos Mosquises Sur	Caribbean Ciliate Infection	3	0.0110206
Cayo de Agua	Orbicella annularis	7	3	0.0453754			Dos Mosquises Sur	Caribbean Ciliate Infection	4	0.0506382
Cayo de Agua	Orbicella annularis	8	1	0			Dos Mosquises Sur	Caribbean Ciliate Infection	5	0.350176
Cayo de Agua	Orbicella annularis	8	2	0.000560224			Dos Mosquises Sur	Caribbean Ciliate Infection	6	0.253418
Cayo de Agua	Orbicella annularis	8	3	0.000814871			Dos Mosquises Sur	Caribbean Ciliate Infection	7	0.00367353
Cayo de Agua	Orbicella annularis	9	1	0.0397596			Dos Mosquises Sur	White Band Disease	1	0
Cayo de Agua	Orbicella annularis	9	2	0.0249402			Dos Mosquises Sur	White Band Disease	2	0.0130838
Cayo de Agua	Orbicella annularis	9	3	0.0466021			Dos Mosquises Sur	White Band Disease	3	0.0319059
Cayo de Agua	Orbicella faveolata	1	1	0			Dos Mosquises Sur	White Band Disease	4	0
Cayo de Agua	Orbicella faveolata	1	2	0.00102598			Dos Mosquises Sur	White Band Disease	5	0.0388206
Cayo de Agua	Orbicella faveolata	1	3	0			Dos Mosquises Sur	White Band Disease	6	0.0449588
Cayo de Agua	Orbicella faveolata	2	1	0.0348002			Dos Mosquises Sur	White Band Disease	7	0.042399
Cayo de Agua	Orbicella faveolata	2	2	0.0148988			Dos Mosquises Sur	White Band Disease	8	0.00792059
Cayo de Agua	Orbicella faveolata	2	3	0.029747
Cayo de Agua	Orbicella faveolata	3	1	0.0151772
Cayo de Agua	Orbicella faveolata	3	2	0.0176
Cayo de Agua	Orbicella faveolata	3	3	0.0128096
Cayo de Agua	Orbicella faveolata	4	1	0.0628048
Cayo de Agua	Orbicella faveolata	4	2	0.0535477
Cayo de Agua	Orbicella faveolata	4	3	0.0662742
Cayo de Agua	Orbicella faveolata	5	1	0.204086
Cayo de Agua	Orbicella faveolata	5	2	0.161684
Cayo de Agua	Orbicella faveolata	5	3	0.059642
Cayo de Agua	Orbicella faveolata	6	1	0.045583
Cayo de Agua	Orbicella faveolata	6	2	0.00192502
Cayo de Agua	Orbicella faveolata	6	3	0.00453347
Cayo de Agua	Orbicella faveolata	7	1	0.175165
Cayo de Agua	Orbicella faveolata	7	2	0.149873
Cayo de Agua	Orbicella faveolata	7	3	0.31438
Dos Mosquises Sur	Orbicella annularis	1	1	0
Dos Mosquises Sur	Orbicella annularis	1	2	0
Dos Mosquises Sur	Orbicella annularis	1	3	0
Dos Mosquises Sur	Orbicella annularis	2	1	0.0305205
Dos Mosquises Sur	Orbicella annularis	2	2	0.0346639
Dos Mosquises Sur	Orbicella annularis	2	3	0.0297269
Dos Mosquises Sur	Orbicella annularis	3	1	0.0417024
Dos Mosquises Sur	Orbicella annularis	3	2	0.0497274
Dos Mosquises Sur	Orbicella annularis	3	3	0.0314222
Dos Mosquises Sur	Orbicella annularis	4	1	0
Dos Mosquises Sur	Orbicella annularis	4	2	0
Dos Mosquises Sur	Orbicella annularis	4	3	0.0531918
Dos Mosquises Sur	Orbicella annularis	5	1	0
Dos Mosquises Sur	Orbicella annularis	5	2	0.000423256
Dos Mosquises Sur	Orbicella annularis	5	3	0.00314942
Dos Mosquises Sur	Orbicella annularis	6	1	0.00384011
Dos Mosquises Sur	Orbicella annularis	6	2	0.0217709
Dos Mosquises Sur	Orbicella annularis	6	3	0.0150591
Dos Mosquises Sur	Orbicella annularis	7	1	0.125752
Dos Mosquises Sur	Orbicella annularis	7	2	0.0920338
Dos Mosquises Sur	Orbicella annularis	7	3	0.0790007
Dos Mosquises Sur	Orbicella annularis	8	1	0.0286029
Dos Mosquises Sur	Orbicella annularis	8	2	0.0223055
Dos Mosquises Sur	Orbicella annularis	8	3	0.0183113
Dos Mosquises Sur	Orbicella faveolata	1	1	0.0130619
Dos Mosquises Sur	Orbicella faveolata	1	2	0.0262512
Dos Mosquises Sur	Orbicella faveolata	1	3	0.035296
Dos Mosquises Sur	Orbicella faveolata	2	1	0.0204445
Dos Mosquises Sur	Orbicella faveolata	2	2	0.000807312
Dos Mosquises Sur	Orbicella faveolata	2	3	0
Dos Mosquises Sur	Orbicella faveolata	3	1	0.0850809
Dos Mosquises Sur	Orbicella faveolata	3	2	0.108189
Dos Mosquises Sur	Orbicella faveolata	3	3	0.0934074
Dos Mosquises Sur	Orbicella faveolata	4	1	0.154654
Dos Mosquises Sur	Orbicella faveolata	4	2	0.140167
Dos Mosquises Sur	Orbicella faveolata	4	3	0.140389
Dos Mosquises Sur	Orbicella faveolata	5	1	0.148106
Dos Mosquises Sur	Orbicella faveolata	5	2	0.133026
Dos Mosquises Sur	Orbicella faveolata	5	3	0.153535
Dos Mosquises Sur	Orbicella faveolata	6	1	0.0124827
Dos Mosquises Sur	Orbicella faveolata	6	2	0.0017618
Dos Mosquises Sur	Orbicella faveolata	6	3	0.00590202
Dos Mosquises Sur	Orbicella faveolata	7	1	0.00745377
Dos Mosquises Sur	Orbicella faveolata	7	2	0.0169803
Dos Mosquises Sur	Orbicella faveolata	7	3	0.0305445
Dos Mosquises Sur	Orbicella faveolata	8	1	0.0717398
Dos Mosquises Sur	Orbicella faveolata	8	2	0.0350234
Dos Mosquises Sur	Orbicella faveolata	8	3	0.0140697

## Sheet: November 2012-March2013
Orbicella annularis and Orbicella faveolata							Acropora cervicornis
Site	Species	Replica	Position	Mortality Rate (cm/day)			Site	Disease	Replica	Mortality Rate (cm/day)
Cayo de Agua	Orbicella annularis	1	1	0.0150198			Cayo de Agua	Caribbean Ciliate Infection	1	0.129557
Cayo de Agua	Orbicella annularis	1	2	0.00376742			Cayo de Agua	Caribbean Ciliate Infection	2	0.040803
Cayo de Agua	Orbicella annularis	1	3	0			Cayo de Agua	Caribbean Ciliate Infection	3	0.00676884
Cayo de Agua	Orbicella annularis	2	1	0			Cayo de Agua	Caribbean Ciliate Infection	4	0
Cayo de Agua	Orbicella annularis	2	2	0.00316808			Cayo de Agua	White Band Disease	1	0
Cayo de Agua	Orbicella annularis	2	3	0.00805853			Cayo de Agua	White Band Disease	2	0.178907
Cayo de Agua	Orbicella annularis	3	1	0.0242534			Cayo de Agua	White Band Disease	3	0.109309
Cayo de Agua	Orbicella annularis	3	2	0.0389902			Cayo de Agua	White Band Disease	4	0.0200223
Cayo de Agua	Orbicella annularis	3	3	0.0563093			Cayo de Agua	White Band Disease	5	0.110227
Cayo de Agua	Orbicella annularis	4	1	0.00454545			Cayo de Agua	White Band Disease	6	0.0641026
Cayo de Agua	Orbicella annularis	4	2	0.00209486			Dos Mosquises Sur	Caribbean Ciliate Infection	1	0.00280488
Cayo de Agua	Orbicella annularis	4	3	0.00313241			Dos Mosquises Sur	Caribbean Ciliate Infection	2	0.00684824
Cayo de Agua	Orbicella annularis	5	1	0.00884991			Dos Mosquises Sur	Caribbean Ciliate Infection	3	0
Cayo de Agua	Orbicella annularis	5	2	0.00425339			Dos Mosquises Sur	Caribbean Ciliate Infection	4	0.012382
Cayo de Agua	Orbicella annularis	5	3	0.00443812			Dos Mosquises Sur	Caribbean Ciliate Infection	5	0.0736332
Cayo de Agua	Orbicella annularis	6	1	0.00801611			Dos Mosquises Sur	Caribbean Ciliate Infection	6	0.0434045
Cayo de Agua	Orbicella annularis	6	2	0.0111233			Dos Mosquises Sur	White Band Disease	1	0.0387919
Cayo de Agua	Orbicella annularis	6	3	0.0145334			Dos Mosquises Sur	White Band Disease	2	0.131472
Cayo de Agua	Orbicella faveolata	1	1	0.0183184			Dos Mosquises Sur	White Band Disease	3	0.00421081
Cayo de Agua	Orbicella faveolata	1	2	0.00872158			Dos Mosquises Sur	White Band Disease	4	0.0798627
Cayo de Agua	Orbicella faveolata	1	3	0.0153178			Dos Mosquises Sur	White Band Disease	5	0.101086
Cayo de Agua	Orbicella faveolata	2	1	0.0213201			Dos Mosquises Sur	White Band Disease	6	0.0205295
Cayo de Agua	Orbicella faveolata	2	2	0.0288315			Dos Mosquises Sur	White Band Disease	7	0.101238
Cayo de Agua	Orbicella faveolata	2	3	0.0197139			Dos Mosquises Sur	White Band Disease	8	0.0846727
Cayo de Agua	Orbicella faveolata	3	1	0.0309517
Cayo de Agua	Orbicella faveolata	3	2	0.0215094
Cayo de Agua	Orbicella faveolata	3	3	0.0227087
Cayo de Agua	Orbicella faveolata	4	1	0.0320243
Cayo de Agua	Orbicella faveolata	4	2	0.0121085
Cayo de Agua	Orbicella faveolata	4	3	0.0244039
Dos Mosquises Sur	Orbicella annularis	1	1	0.0296236
Dos Mosquises Sur	Orbicella annularis	1	2	0.0189487
Dos Mosquises Sur	Orbicella annularis	1	3	0.0116807
Dos Mosquises Sur	Orbicella annularis	2	1	0.0161594
Dos Mosquises Sur	Orbicella annularis	2	2	0
Dos Mosquises Sur	Orbicella annularis	2	3	0
Dos Mosquises Sur	Orbicella annularis	3	1	0.00153827
Dos Mosquises Sur	Orbicella annularis	3	2	0.00261378
Dos Mosquises Sur	Orbicella annularis	3	3	0.00948894
Dos Mosquises Sur	Orbicella annularis	4	1	0
Dos Mosquises Sur	Orbicella annularis	4	2	0.0025425
Dos Mosquises Sur	Orbicella annularis	4	3	0
Dos Mosquises Sur	Orbicella annularis	5	1	0.000965947
Dos Mosquises Sur	Orbicella annularis	5	2	0.00120956
Dos Mosquises Sur	Orbicella annularis	5	3	0.0182099
Dos Mosquises Sur	Orbicella faveolata	1	1	0.00209372
Dos Mosquises Sur	Orbicella faveolata	1	2	0
Dos Mosquises Sur	Orbicella faveolata	1	3	0.0039898
Dos Mosquises Sur	Orbicella faveolata	2	1	0.0348039
Dos Mosquises Sur	Orbicella faveolata	2	2	0.0408955
Dos Mosquises Sur	Orbicella faveolata	2	3	0.0548206
Dos Mosquises Sur	Orbicella faveolata	3	1	0.0423315
Dos Mosquises Sur	Orbicella faveolata	3	2	0.0321424
Dos Mosquises Sur	Orbicella faveolata	3	3	0.00320106
Dos Mosquises Sur	Orbicella faveolata	4	1	0.00907112
Dos Mosquises Sur	Orbicella faveolata	4	2	0.0122862
Dos Mosquises Sur	Orbicella faveolata	4	3	0.00425738
Dos Mosquises Sur	Orbicella faveolata	5	1	0.00436526
Dos Mosquises Sur	Orbicella faveolata	5	2	0.00893978
Dos Mosquises Sur	Orbicella faveolata	5	3	0.0115845
Dos Mosquises Sur	Orbicella faveolata	6	1	0.0370035
Dos Mosquises Sur	Orbicella faveolata	6	2	0.0309317
Dos Mosquises Sur	Orbicella faveolata	6	3	0.0285714

## Sheet: Regeneration Rate
Specie/Disease	Replica	Regeneration Rate (cm/day)
Orbicella annularis/CCI	1	0.0014999
Orbicella annularis/CCI	2	0.000885197
Orbicella annularis/CCI	3	0.00299442
Orbicella annularis/CCI	4	0.00246914
Orbicella annularis/CCI	5	0.00360395
Orbicella annularis/CCI	6	0.000383583
Orbicella annularis/CCI	7	0.00344329
Orbicella annularis/CCI	8	0.00156053
Orbicella annularis/CCI	9	0.00042733
Orbicella annularis/CCI	10	0.00752591
Orbicella annularis/CCI	11	7.61765e-05
Orbicella annularis/CCI	12	0.00267964
Orbicella annularis/CCI	13	0.00101981
Orbicella annularis/CCI	14	0.000198556
Orbicella annularis/CCI	15	0.00185872
Orbicella faveolata/CCI	1	0.00224524
Orbicella faveolata/CCI	2	0.00919246
Orbicella faveolata/CCI	3	0.000958546
Orbicella faveolata/CCI	4	6.97181e-05
Orbicella faveolata/CCI	5	0.000322558
Orbicella faveolata/CCI	6	0.00079401
Orbicella faveolata/CCI	7	0.000908954
Orbicella faveolata/CCI	8	0.00161649
Acropora cervicornis/CCI	1	0.0123499
Acropora cervicornis/CCI	2	0.00348774
Acropora cervicornis/CCI	3	0.00553409
Acropora cervicornis/CCI	4	0.0034276
Acropora cervicornis/WBD	1	0.00449221
Acropora cervicornis/WBD	2	0.00256177
Acropora cervicornis/WBD	3	0.0119559
Acropora cervicornis/WBD	4	0.01465
Acropora cervicornis/WBD	5	0.00790934
Acropora cervicornis/WBD	6	0.00770967
Acropora cervicornis/WBD	7	0.00918951
